# Supplementary material for: Efficiency and selectivity of CO2 reduction to CO on gold gas diffusion electrodes in acidic media
Source: PubMed Central journal article supplement (PMC8368099; doi:10.1038/s41467-021-24936-6), 2021-08-16
Supplement: 41467_2021_24936_MOESM1_ESM.pdf [file 41467_2021_24936_MOESM1_ESM.pdf]

# **Efficiency and selectivity CO<sub>2</sub> reduction to CO on gold gas diffusion electrodes in acidic media**

Mariana C. O. Monteiro<sup>a</sup>, Matthew F. Philips<sup>a,b</sup>, Klaas Jan P. Schouten<sup>b,c,\*</sup>, Marc T. M. Koper<sup>a,\*</sup>

<sup>a</sup> Leiden Institute of Chemistry, Leiden University, P.O. Box 9502, 2300 RA, Leiden, the Netherlands

<sup>b</sup> Avantium, Science Park 408, 1098 XH Amsterdam, The Netherlands

<sup>c</sup> Van't Hoff Institute for Molecular Sciences, University of Amsterdam, P.O. Box 94157, 1090 GD Amsterdam, The Netherlands

## **Supplementary Information**

## 1. Effect of pH

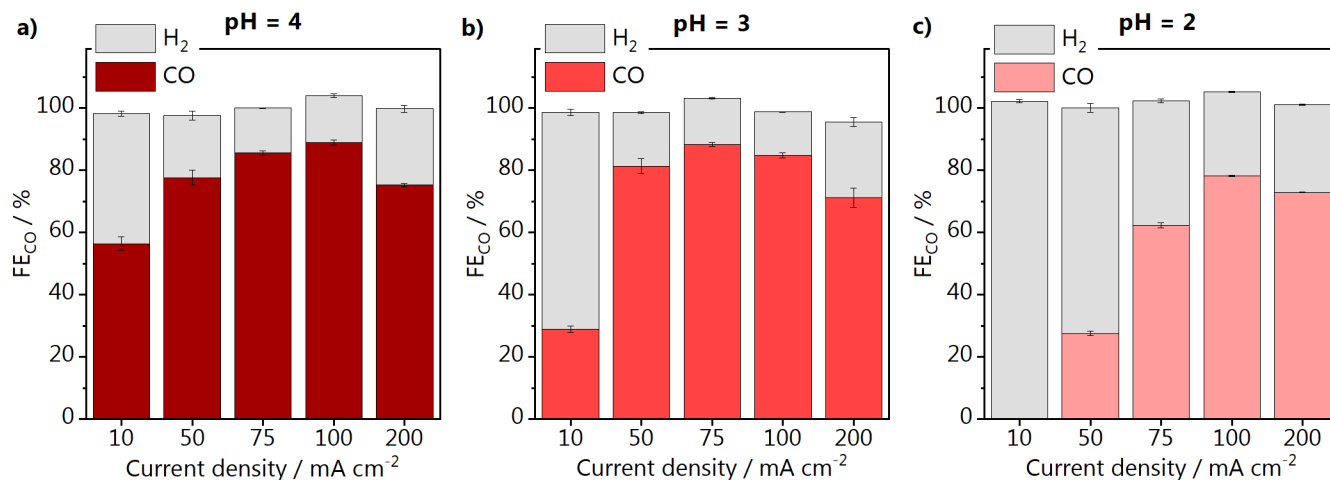

**Supplementary Figure 1.** Faradaic efficiencies for CO and H<sub>2</sub> obtained during one hour electrolysis at each current density displayed. The catholyte was 1 M Cs<sub>2</sub>SO<sub>4</sub>, **a)** pH 4, **b)** pH 3 and **c)** pH 2. Catalyst loading 2 mg cm<sup>-2</sup>. Error bars are calculated based on three individual measurements.

## 2. Cation identity

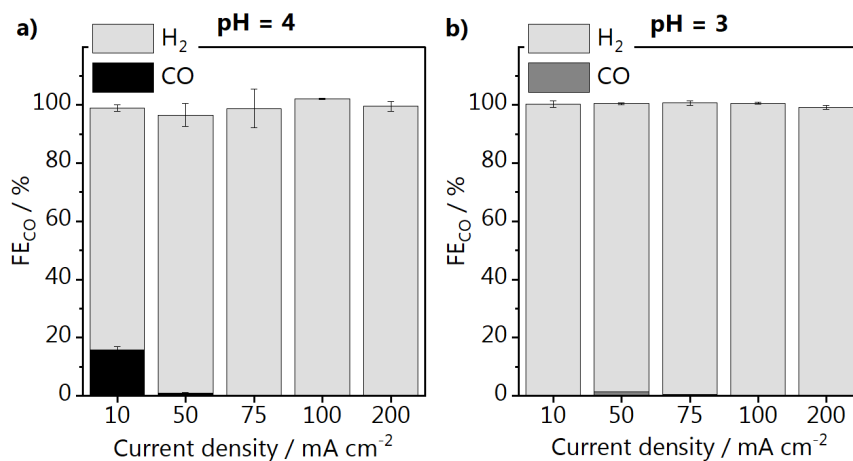

**Supplementary Figure 2.** Faradaic efficiencies for CO and H<sub>2</sub> obtained during one hour electrolysis at each current density displayed. The catholyte was 1 M Li<sub>2</sub>SO<sub>4</sub>, **a)** pH 4 and **b)** pH 3. Catalyst loading 2 mg cm<sup>-2</sup>. Error bars are calculated based on three individual measurements.

### 3. Effect of the catalyst loading

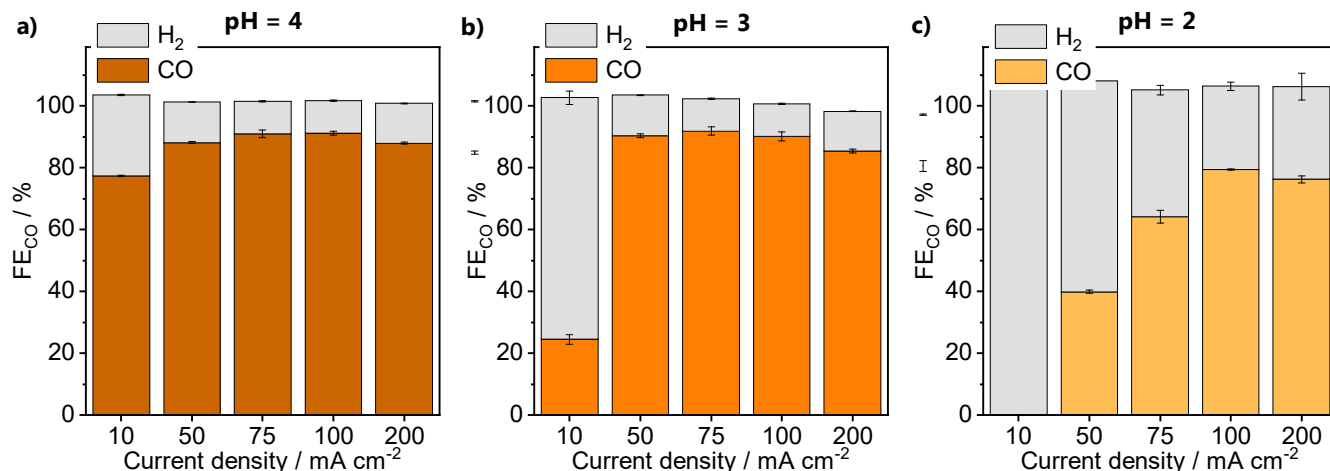

**Supplementary Figure 3.** Faradaic efficiencies for CO and H<sub>2</sub> obtained during one hour electrolysis at each current density displayed. The catholyte was 1 M Cs<sub>2</sub>SO<sub>4</sub>; **a)** pH 4, **b)** pH 3 and **c)** pH 2. Catalyst loading 1 mg cm<sup>-2</sup>. Error bars are calculated based on three individual measurements.

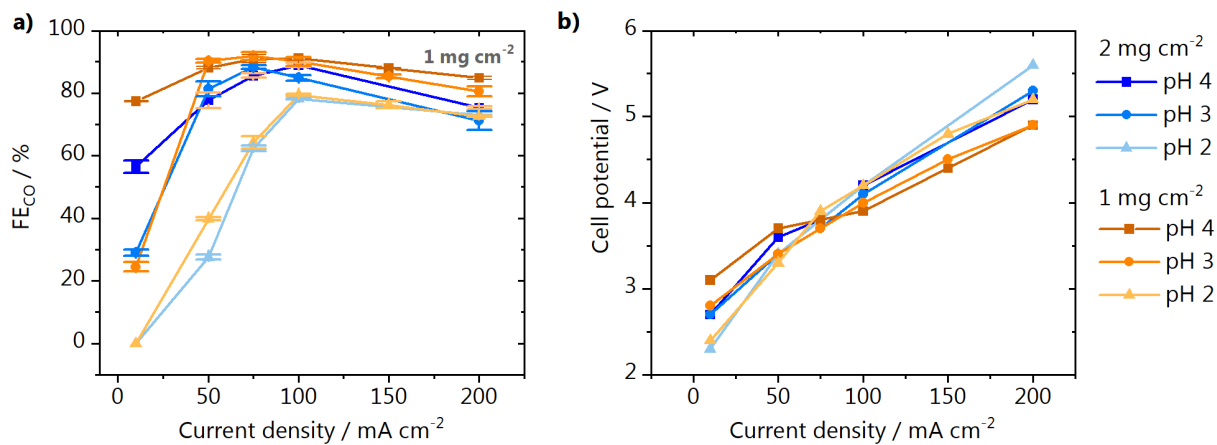

**Supplementary Figure 4.** Electrolysis performed in 1 M Cs<sub>2</sub>SO<sub>4</sub>, catalyst loading 1 mg cm<sup>-2</sup> or 2 mg cm<sup>-2</sup>, **a)** faradaic efficiency for CO and **b)** cell potential. The data points displayed are an average obtained during 1 hour electrolysis. Error bars are calculated based on three individual measurements.

#### 4. SEM micrographs and EDX elemental analysis of the GDEs with different loadings.

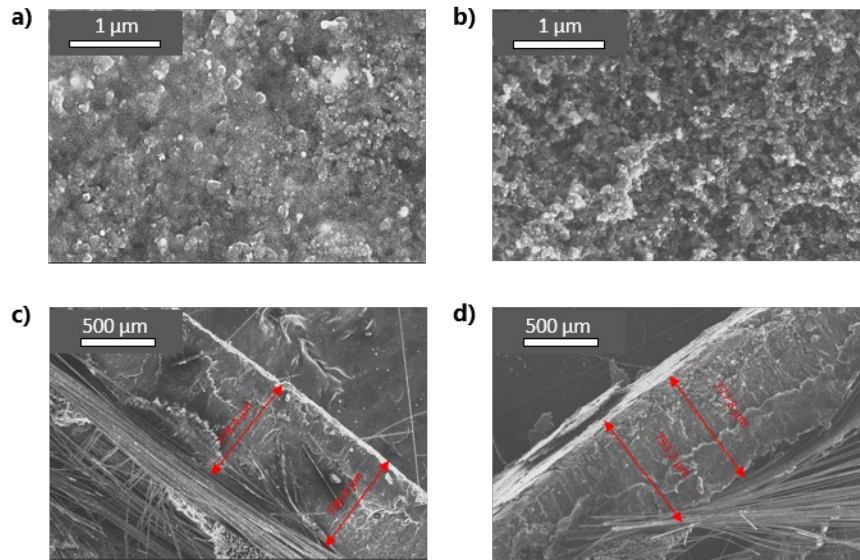

**Supplementary Figure 5.** SEM micrograph of the gold GDEs. Top view of the a) 1 mg cm<sup>-2</sup> and b) 2 mg cm<sup>-2</sup> catalyst, and cross-section of the c) 1 mg cm<sup>-2</sup> and d) 2 mg cm<sup>-2</sup> catalyst.

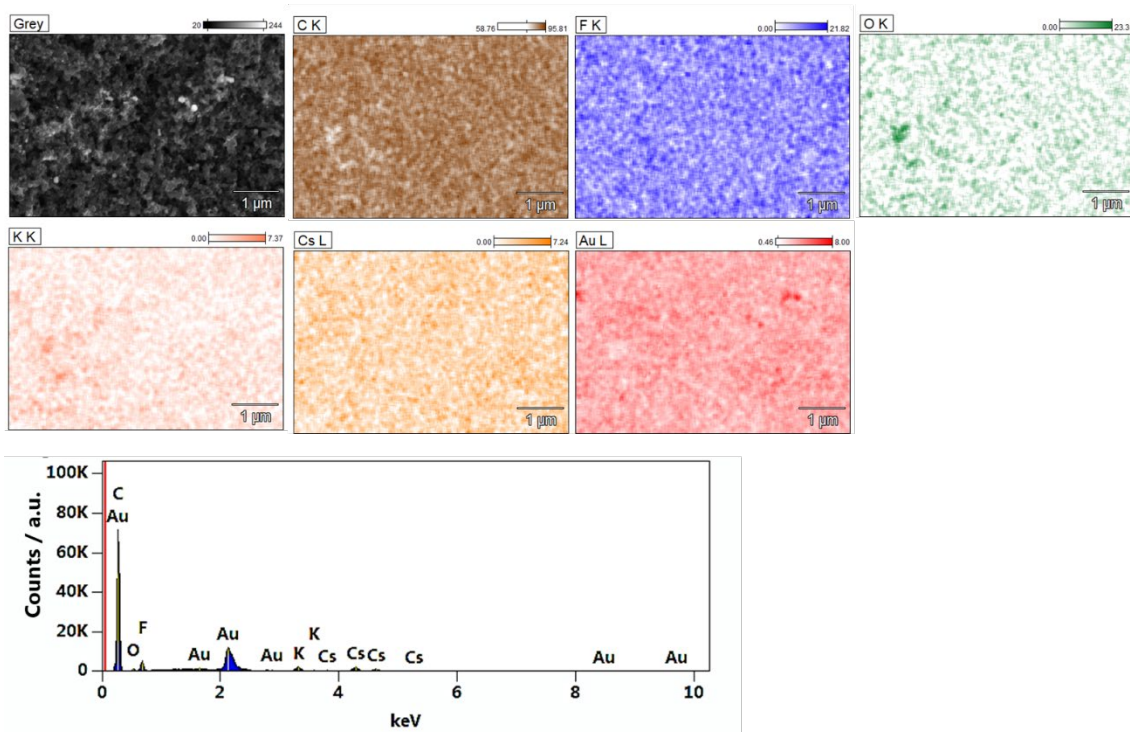

**Supplementary Figure 6.** SEM micrograph, EDX elemental map and spectrum of the gold GDE with 1 mg cm<sup>-2</sup> loading.

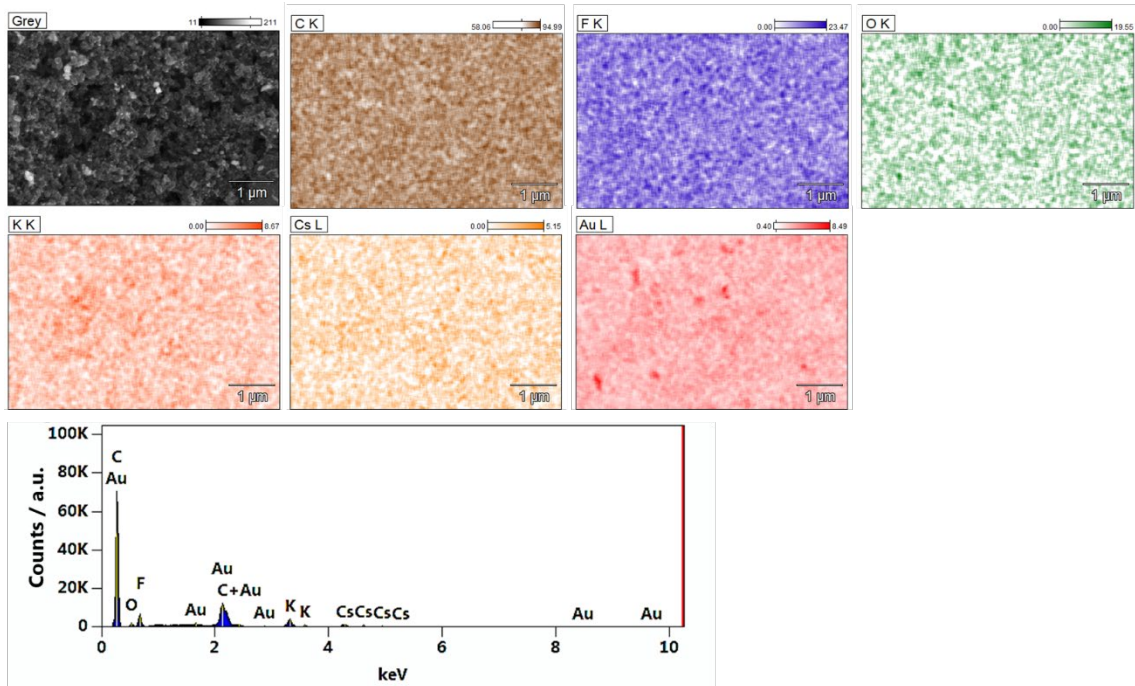

**Supplementary Figure 7.** SEM micrograph, EDX elemental map and spectrum of the gold GDE with  $2 \text{ mg cm}^{-2}$  loading.

## 5. Comparison with bicarbonate

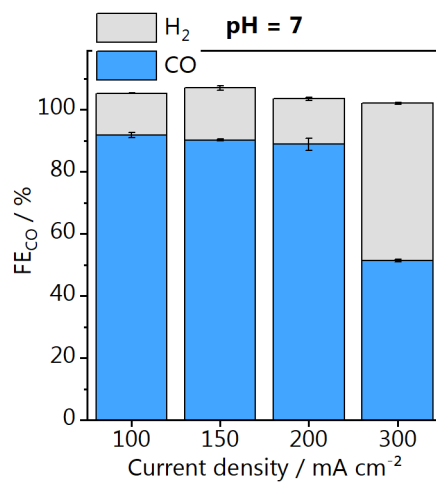

**Supplementary Figure 8.** Faradaic efficiencies for CO and H<sub>2</sub> obtained during one hour electrolysis at each current density displayed. The catholyte was 1 M KHCO<sub>3</sub> (pH 7) and the catalyst loading 1 mg cm<sup>-2</sup>. Error bars are calculated based on three individual measurements.

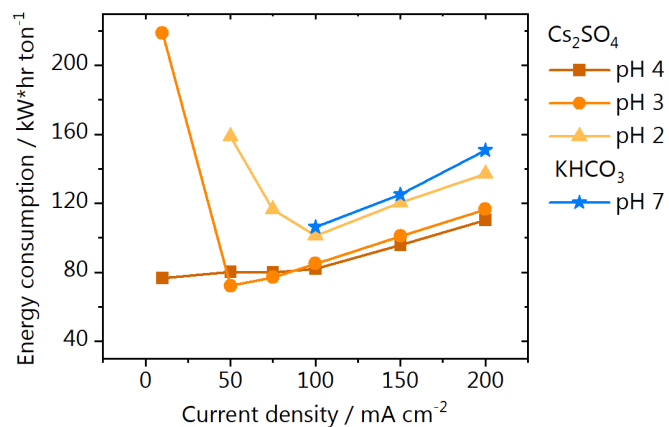

**Supplementary Figure 9.** Energy consumption per ton of CO produced, based on the faradaic efficiencies and cell potentials obtained for electrolysis in 1 M Cs<sub>2</sub>SO<sub>4</sub> or 1 M KHCO<sub>3</sub> at different current densities (catalyst loading 2 mg cm<sup>-2</sup>).

Energy efficiency calculation:

$$\varepsilon_{energy} = \frac{(E_{CO_2}^0 + E_{O_2}^0) * FE_{CO}}{E_{cell}} \quad \text{Supplementary Equation 1}$$

where  $E^0$  are the standard potentials of the cathode and anode reactions,  $FE$  is the faradaic efficiency as percentage, and  $E_{cell}$  is the cell potential in V.

Energy consumption calculation:

$$\frac{kW * h}{ton} = \frac{E_{cell} * n * F}{MW * FE_{CO} * 3.6} \quad \text{Supplementary Equation 2}$$

where  $n$  is the number of electrons transferred (dimensionless),  $F$  is Faraday's constant in C mol<sup>-1</sup>,  $MW$  is the molecular weight of CO in g mol<sup>-1</sup>.

## 6. Comparison with literature

Supplementary Table 1. Experimental details of the different work from literature, used for the comparison made in Figure 5 in the main text. Only GDEs with geometrical surface area equal or larger than 5 cm<sup>2</sup> were considered.

|             | Cathode (GDE)                                | Anode            | Electrolyte                                                    | CO <sub>2</sub> flow (mL min <sup>-1</sup> ) | Load (mg cm <sup>-2</sup> ) | Cathode area (cm <sup>2</sup> ) | Ref       |
|-------------|----------------------------------------------|------------------|----------------------------------------------------------------|----------------------------------------------|-----------------------------|---------------------------------|-----------|
| this work   | Au nanoparticles                             | DSA <sup>®</sup> | 1 M Cs <sub>2</sub> SO <sub>4</sub>                            | 50                                           | 1                           | 10                              | this work |
| Haas 2018   | Ag GDE Covestro                              | Ir-MMO/Ti sheet  | 0.1 M K <sub>2</sub> SO <sub>4</sub> + 1.5 M KHCO <sub>3</sub> | 52 and 10.5                                  | n.a.                        | 10                              | 1         |
| Verma 2018  | MWNT/PyPBI/Au on Sigracet <sup>®</sup> 35 BC | IrO <sub>2</sub> | 2 M KHCO <sub>3</sub> or 2 M KOH                               | 17                                           | 1                           | 5                               | 2         |
| Verma 2016  | Ag NP on Sigracet <sup>®</sup> 35 BC         | IrO <sub>2</sub> | 1 M KHCO <sub>3</sub>                                          | 17                                           | 2                           | 10                              | 3         |
| Duarte 2019 | Ag NP on Sigracet <sup>®</sup> 39 BC         | platinized Ti    | 2 M KHCO <sub>3</sub>                                          | 77                                           | 0.75                        | 10                              | 4         |
| Jeanty 2018 | Ag GDE Covestro                              | n.a.             | 0.4 M K <sub>2</sub> SO <sub>4</sub>                           | 21                                           | n.a.                        | 7.67                            | 5         |

### Supplementary References

1. Haas, T., Krause, R., Weber, R., Demler, M. & Schmid, G. Technical photosynthesis involving CO<sub>2</sub> electrolysis and fermentation. *Nat. Catal.* **1**, 32–39 (2018).
2. Verma, S. *et al.* Insights into the Low Overpotential Electroreduction of CO<sub>2</sub> to CO on a Supported Gold Catalyst in an Alkaline Flow Electrolyzer. *ACS Energy Lett.* **3**, 193–198 (2018).
3. Verma, S., Lu, X., Ma, S., Masel, R. I. & Kenis, P. J. A. The effect of electrolyte composition on the electroreduction of CO<sub>2</sub> to CO on Ag based gas diffusion electrodes. *Phys. Chem. Chem. Phys.* **18**, 7075–7084 (2016).
4. Duarte, M., De Mot, B., Hereijgers, J. & Breugelmanns, T. Electrochemical Reduction of CO<sub>2</sub>: Effect of Convective CO<sub>2</sub> Supply in Gas Diffusion Electrodes. *ChemElectroChem* **6**, 5596–5602 (2019).
5. Jeanty, P. *et al.* Upscaling and continuous operation of electrochemical CO<sub>2</sub> to CO conversion in aqueous solutions on silver gas diffusion electrodes. *J. CO<sub>2</sub> Util.* **24**, 454–462 (2018).
